# Supplementary material for: Alzheimer’s disease tau is a prominent pathology in LRRK2 Parkinson’s disease
Source: Acta Neuropathol Commun. 2019 Nov 16;7:183. doi: 10.1186/s40478-019-0836-x (PMC6858668; doi:10.1186/s40478-019-0836-x)
Supplement: Supplementary file 2 — Additional file 2. Table S1. Clinical and Pathological Data for Cases. [file 40478_2019_836_MOESM2_ESM.xlsx]

## Sheet: Sheet1
Clinical and Neuropathological Information
Case	ClinDx	NpDx1	NpDx2	AgeatDeath	AgeOnset	DiseaseDur
PSP	PSP			72	69	3
Pick's	Pick			57	48	9
CBD	CBD			67	61	6
AD	AD			68	54	14
p.G2019S-1	PD (not demented)	PD		66	47	19
p.G2019S-2	PD, Dementia	LBD, PDD	AD	87	78	9
p.G2019S-3	PD	PD, atypical	AD	78	58	20
p.G2019S-4	PD (not demented)	PSP		81	72	9
p.G2019S-5	Schizophrenia, Dementia possible			81
p.G2019S-6	PD (not demented)	PD, atypical	AD, Cerebrovascular disease	77	73	4
p.G2019S-7	PD (not demented)	PD, atypical	AD	84	65	19
p.G2019S-8	PD (not demented)	LBD, PD		79	49	30
p.G2019S-9	PD (not demented)	LBD, PD	Low AD neurpath changes	86	67	19
p.G2019S-10	PDD	LBD, PDD	AD	81	54	27
p.L1165P	PD, Dementia	PD	Senile Dementia with Tangles	81	46	35
p.R793M	PDD	LBD,PD		92	78	14
Pathology Measures (Percentage of Area Occupied)
Case	Region	AT8	GT38	p-Syn	NAB228
PSP	EC	0.0031917	0	0.00507761	0.634274
Pick's	EC	3.89162	0	0	0
CBD	EC	0.0206991	0.000115922	0.000148788	0
AD	EC	7.2393	1.98853	12.4026	3.19037
p.G2019S-1	EC	0.000118347	0.000454935	0.0412353	0.568051
p.G2019S-2	EC	7.35534	0.306265	5.50391	0.689988
p.G2019S-3	EC	0.0373895	0.00620304	0.000196472	0
p.G2019S-4	EC	0.248128	0.118847	0.000939405	0.0433782
p.G2019S-5	EC	2.72921e-05	0.00163896	0	0.00084412
p.G2019S-6	EC	0.0989899	0.0102815	0.000409542	1.12982
p.G2019S-7	EC	1.37201	0.272766	0.000319669	1.65739
p.G2019S-8	EC	0.0913172	0.0319977	0.222576	0.023078
p.G2019S-9	EC	0.00172544	0.000446961	0.270023	0.677333
p.G2019S-10	EC	1.44336	0.337122	2.3267	0.901642
p.L1165P	EC	1.37287	0.727124	0.044989	0
p.R793M	EC	1.40017	0.389448	1.97508	0.0231666
PSP	CA	0.0204195	0.00167822	0.000615661	0.0414011
Pick's	CA	6.30068	0.000108813	0	0
CBD	CA	0.580285	0.000248449	0.00044031	0
AD	CA	1.88076	4.61604	5.1151	0.647431
p.G2019S-1	CA	0	0	0.0304227	0.224123
p.G2019S-2	CA	2.84364	0.26648	0.209222	0.249052
p.G2019S-3	CA	0.00900734	0.00356869	0.00322747	0
p.G2019S-4	CA	0.0211038	0.00956034	0.000232181	0.0011154
p.G2019S-5	CA	0	0	0.000734353	0
p.G2019S-6	CA	0.116498	0.0256163	0.000724819	0.424829
p.G2019S-7	CA	0.105705	0.00105511	0.00013454	0
p.G2019S-8	CA	0.0240306	0.00394861	0.414604	0.00760866
p.G2019S-9	CA	0.0372486	0.00240876	0.432528	0.0216063
p.G2019S-10	CA	0.271844	0.0653643	0.515448	0.63581
p.L1165P	CA	7.81675	1.91912	1.25283	0
p.R793M	CA	1.70465	0.151105	9.81805	0
PSP	DG	0.0177693	0	0.00494083	0.125141
Pick's	DG	2.16458	0	0	0.00518215
CBD	DG	0.223651	0.00014475	0	0
AD	DG	0.0327044	0.125484	1.13486	0.454748
p.G2019S-1	DG	0	0	0.013295	0.0109896
p.G2019S-2	DG	0.292267	0.0646301	0.433042	0.486863
p.G2019S-3	DG	0	0	0.000974	0.00654493
p.G2019S-4	DG	0.00312079	0.00209411	0.000357909	0
p.G2019S-5	DG	0	0	0.00402918	0
p.G2019S-6	DG	1.85982	0.00640078	0.00230721	0.477374
p.G2019S-7	DG	0	0	0.000307826	0.723343
p.G2019S-8	DG	0.00295022	0.000187403	0.0351923	0.0105573
p.G2019S-9	DG	0.0139447	0.000722384	0.145626	0.00161241
p.G2019S-10	DG	0.0087373	0.0135814	0.191345	0.229455
p.L1165P	DG	0.431585	0.037614	0.0393168	0
p.R793M	DG	1.82419	0.0339836	4.62808	0
PSP	Visual	0	0	0.000217782	1.51028
Pick's	Visual	0	0	2.3373e-05	0.000216213
CBD	Visual	0	0	3.56685e-05	0
AD	Visual	5.47615	2.51693	0.026045	3.93972
p.G2019S-1	Visual	0.000723314	0.000907895	0.00333382	0.483766
p.G2019S-2	Visual	0	0	0	1.7781
p.G2019S-3	Visual	0	0	0.000332367	0.347434
p.G2019S-4	Visual	0.000647959	0.000442113	0.000264317	0.435748
p.G2019S-5	Visual	6.90021e-05	0.00118031	0.00216708	0.00254761
p.G2019S-6	Visual	0.0326007	7.25279e-05	0.000345665	0.902621
p.G2019S-7	Visual	0.000843247	0.00168305	0	0.971167
p.G2019S-8	Visual	3.54655e-05	0.00127028	0.00245804	0.768546
p.G2019S-9	Visual	0	0	0.0030868	0.871223
p.G2019S-10	Visual	0.0113369	0.000428785	0.0156637	2.29603
p.L1165P	Visual	0	0	0.00263058	0.00463284
p.R793M	Visual	9.1538e-05	0.000525592	0.00106178	0.00223265
PSP	Amyg	0.022782	0.000224783	0.0237812	0.219185
Pick's	Amyg	1.42252	0.000383579	0.000464146	0
CBD	Amyg	0.353385	0.00173272	0	0.000957349
AD	Amyg	2.6071	0.640439	5.83313	1.14492
p.G2019S-1	Amyg	0.000539074	0.000722901	0.0426691	0.413096
p.G2019S-2	Amyg	0.482896	0.319995	26.5574	0.435725
p.G2019S-3	Amyg	0.00612265	0.00247119	0	0.000574056
p.G2019S-4	Amyg	0.00795512	0.00248376	0.000514259	0.0343103
p.G2019S-5	Amyg	0.00016276	0.00058679	0.000313276	0
p.G2019S-6	Amyg	0.0324296	0.00605265	0.000683384	0.134201
p.G2019S-7	Amyg	0.149629	0.0095804	0.00384211	1.12822
p.G2019S-8	Amyg	0.229782	0.00588458	3.81692	0.848918
p.G2019S-9	Amyg	0.0424956	0.00481547	0.123459	0.139715
p.G2019S-10	Amyg	0.0629273	0.0432043	2.5594	0.511268
p.L1165P	Amyg	0.253888	0.0953757	1.68039	0
p.R793M	Amyg	0.0102679	0.0135463	1.04756	0
PSP	Midbrain	0.0723338	0	0.00503328	0
Pick's	Midbrain	0.0393551	0	0	0
CBD	Midbrain	0.145336	0	0	0
AD	Midbrain	0.00782701	0.0100221	0.222546	0.0646747
p.G2019S-1	Midbrain	0.000509901	0	0.223783	0
p.G2019S-2	Midbrain	0	0	0.131547	0
p.G2019S-3	Midbrain	0.00706585	0.00128479	0	0
p.G2019S-4	Midbrain	0	0	0.000952207	0
p.G2019S-5	Midbrain	0.0409966	0.0201423	0	0
p.G2019S-6	Midbrain	0.0229497	0.00834667	0	0
p.G2019S-7	Midbrain	0.0529806	0.00659571	0	0
p.G2019S-8	Midbrain	0.0130161	0.00714679	0.105363	0.0126729
p.G2019S-9	Midbrain	0	0	0.0970955	0
p.G2019S-10	Midbrain	0.00350018	0.0121499	0.412238	0
p.L1165P	Midbrain	0.0558021	0.0447519	0.293156	0
p.R793M	Midbrain
PSP	Cingulate	0.0138358	1.29608e-05	0.00061057	0.412264
Pick's	Cingulate	1.90367	0	0.00017261	0.00473235
CBD	Cingulate	0.178544	0.000757061	0.00125862	0
AD	Cingulate	0.686703	0.670296	0.103284	1.73251
p.G2019S-1	Cingulate	0.00144531	5.49998e-05	0.936826	0.434632
p.G2019S-2	Cingulate	0.0730722	0.0115384	11.1164	1.1403
p.G2019S-3	Cingulate	0.00421593	0.000345648	0.00252859	0.00575556
p.G2019S-4	Cingulate	0	0	0.00512412	0.507255
p.G2019S-5	Cingulate	9.92917e-05	0.00356065	0	0
p.G2019S-6	Cingulate	0.000199881	0.000963088	0	0.402128
p.G2019S-7	Cingulate	0.0383407	0.00417576	0.00023379	1.61354
p.G2019S-8	Cingulate	0.000548899	0.00162201	0.172403	0.101916
p.G2019S-9	Cingulate	0	0	1.06754	1.13673
p.G2019S-10	Cingulate	0.00240272	0.00506357	4.25414	0.900658
p.L1165P	Cingulate	0.00104646	0.00346784	0.0632885	0
p.R793M	Cingulate	0.00238147	0.000575616	0.721251	0.00219982
